# Supplementary material for: Gold nanoparticle decorated multiwalled carbon nanotube modified electrodes for the electrochemical determination of theophylline
Source: Royal Society of Chemistry journal article supplement (doi:10.1039/c8ay02150c), 2018-01-01
Supplement: c8ay02150c1.pdf [file c8ay02150c1.pdf]

## SUPPLEMENTARY MATERIAL

### **GOLD NANOPARTICLE DECORATED MULTIWALLED CARBON NANOTUBE MODIFIED ELECTRODES FOR THE ELECTROCHEMICAL DETERMINATION OF THEOPHYLLINE**

Wanderson da Silva, Mariana Emilia Ghica, Christopher M.A. Brett

*Department of Chemistry, Faculty of Sciences and Technology,  
University of Coimbra, 3004-535 Coimbra, Portugal*

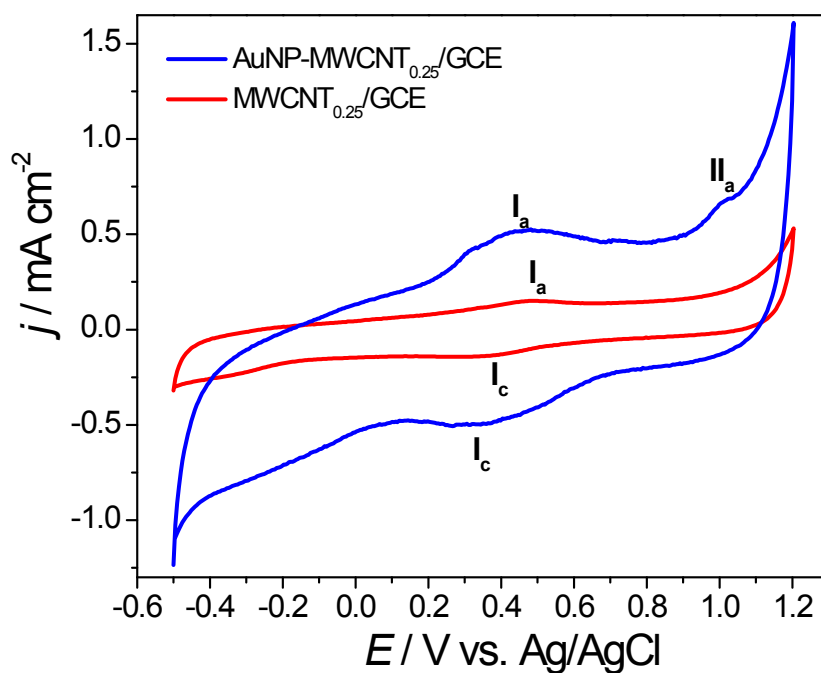

**Figure S1.** Cyclic voltammogram at (blue) AuNP-MWCNT<sub>0.25</sub>/GCE and (red) MWCNT<sub>0.25</sub>/GCE in 0.1 M H<sub>2</sub>SO<sub>4</sub>. Scan rate 100 mV s<sup>-1</sup>.

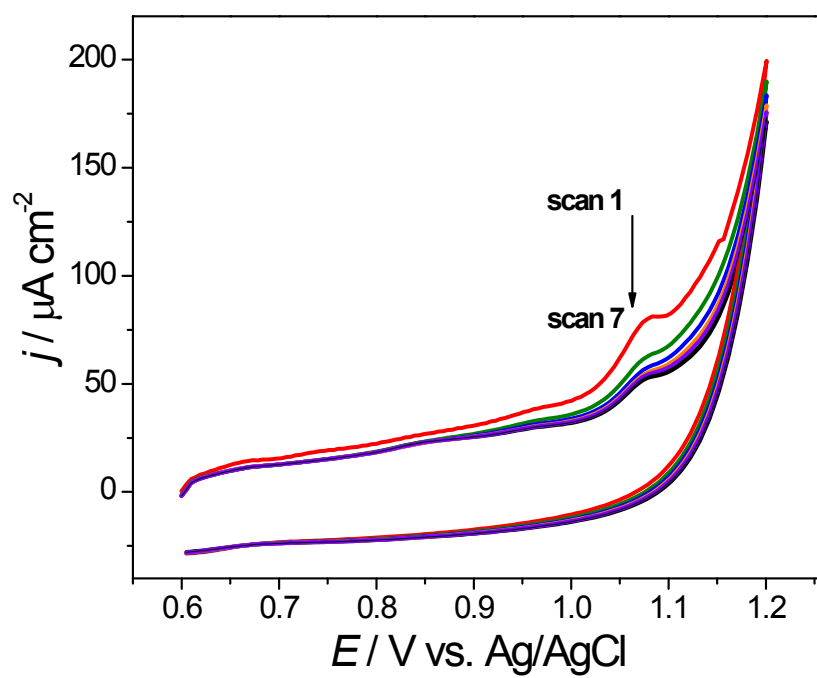

**Figure S2.** Consecutive cyclic voltammograms at AuNP-MWCNT<sub>0.25</sub>/GCE with 50  $\mu\text{M}$  TP in 0.1 M BR buffer solution, pH 6.0, scan rate 100  $\text{mV s}^{-1}$ .
